# Supplementary material
Source: Springer Nature journal article supplement (https://www.springermedizin.de/resource/supplementary/12967_2012_1506_MOESM2_ESM.pdf/9574214)

Supplementary Figure 1.

Eosinophils decrease the percentage of CD3<sup>+</sup>CD4<sup>+</sup> T-cells expressing IL-2 and IL-5.

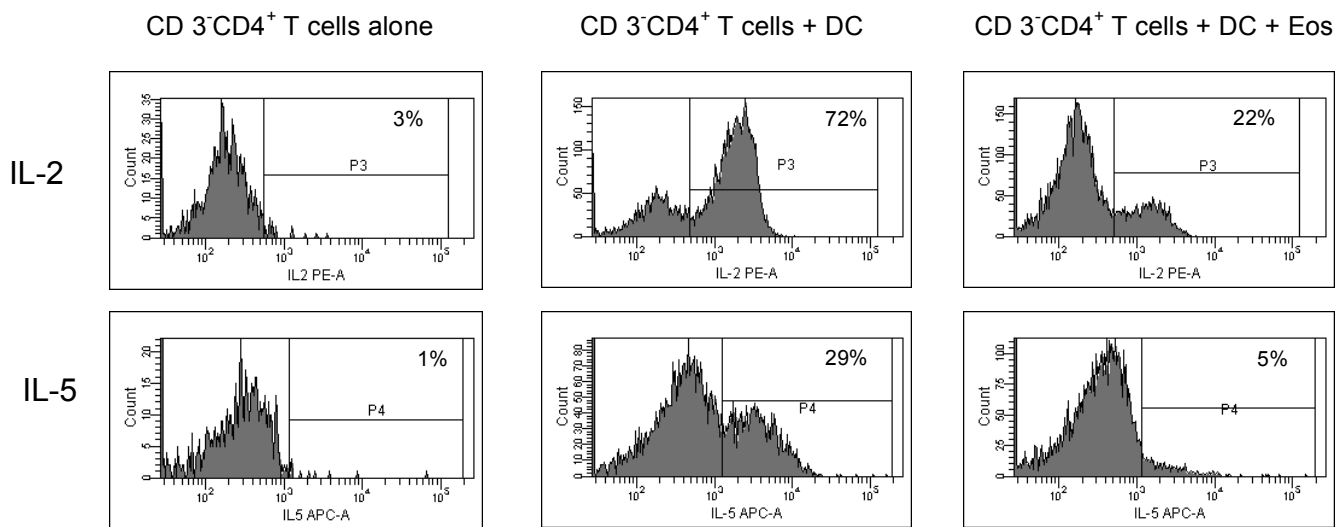

Supplement: MOESM2 [file 9574214]
